# Supplementary material
Source: publisher figshare collection journal article supplement (https://gsajournals.figshare.com/articles/dataset/_/8250953)
Supplement: Supplementary file 3 [file 1]

| Class | <i>S. tuberosum</i> | <i>S. lycopersicum</i> | <i>E. salsugineum</i> | <i>A. thaliana</i> | <i>Z. mays</i> | <i>O. sativa</i> | <i>A. trichopoda</i> | <i>S. moellendorffi</i> | <i>P. patens</i> | <i>C. reinhardtii</i> | <i>B. hygrometrica</i> | Averages |
|-------|---------------------|------------------------|-----------------------|--------------------|----------------|------------------|----------------------|-------------------------|------------------|-----------------------|------------------------|----------|
| =     | na                  | na                     | na                    | 0.30%              | 0.70%          | 0.10%            | na                   | na                      | 5.00%            | 0.80%                 | na                     | 0.90%    |
| c     | na                  | 0.10%                  | na                    | 0.30%              | 1.30%          | na               | na                   | na                      | 1.20%            | 0.40%                 | na                     | 0.40%    |
| e     | 2.20%               | 29.40%                 | 28.90%                | 5.10%              | 10.90%         | 26.00%           | 18.10%               | 20.70%                  | 5.90%            | 24.20%                | 9.00%                  | 16.40%   |
| i     | 2.00%               | 4.70%                  | 1.10%                 | 1.00%              | 2.30%          | 18.70%           | 3.40%                | 0.40%                   | 0.60%            | 0.50%                 | 5.10%                  | 4.40%    |
| j     | na                  | na                     | 0.20%                 | 8.60%              | 7.70%          | 4.00%            | na                   | na                      | 12.20%           | 3.20%                 | na                     | 3.90%    |
| k     | na                  | 0.10%                  | na                    | 3.10%              | 0.50%          | na               | na                   | na                      | 14.60%           | 0.10%                 | na                     | 2.20%    |
| o     | na                  | 0.20%                  | 0.10%                 | 4.80%              | 5.30%          | 0.50%            | na                   | 0.30%                   | 4.40%            | 2.10%                 | na                     | 1.80%    |
| p     | 15.80%              | 18.10%                 | 20.90%                | 13.90%             | 8.70%          | 12.20%           | 13.40%               | 15.30%                  | 4.60%            | 11.00%                | 30.00%                 | 13.60%   |
| s     | na                  | 0.10%                  | na                    | 0.10%              | 0.50%          | na               | na                   | na                      | na               | na                    | na                     | 0.10%    |
| u     | 79.90%              | 46.10%                 | 46.30%                | 34.90%             | 45.50%         | 36.90%           | 65.00%               | 62.40%                  | 44.40%           | 56.20%                | 55.90%                 | 52.30%   |
| x     | na                  | 1.20%                  | 2.50%                 | 27.70%             | 16.60%         | 1.40%            | na                   | 0.90%                   | 6.80%            | 1.60%                 | na                     | 3.90%    |
| y     | na                  | na                     | na                    | 0.20%              | na             | 0.20%            | na                   | na                      | 0.20%            | na                    | na                     | 0.1%     |

**Table S1:** Transcript classes of predicted lncRNAs as identified by gffcompare. Classes are: ‘=’: complete match of intron chain, ‘c’: contained in reference (intron compatible), ‘k’: containment of reference (reverse containment), ‘m’: retained intron(s), full intron chain overlap/match, ‘n’: retained intron(s), partial or no intron chain match, ‘j’: multi-exon with at least one junction match, ‘e’: single exon transfrag partially covering an intron, ‘o’: other same strand overlap with reference exons, ‘s’: intron match on the opposite strand, ‘x’: exonic overlap on the opposite strand, ‘i’: fulling contained within a reference intron, ‘y’: contains a reference with its intron(s), ‘p’: possible polymerase run-on (no actual overlap), ‘u’: none of the above (unknown, intergenic).
